# Supplementary material for: Maternal hypothyroidism in mice influences glucose metabolism in adult offspring
Source: Springer Nature journal article supplement (doi:10.1007/s00125-020-05172-x), 2020-05-30
Supplement: MOESM1 [file 18034576]

## ELECTRONIC SUPPLEMENTARY MATERIAL (ESM)

**ESM TABLE 1.** List of primers used for quantitative RT-PCR

| Symbol<br>GenBank#            | Primers            | Sequences (5'- 3')                              | Amplicon<br>length<br>(bp) |
|-------------------------------|--------------------|-------------------------------------------------|----------------------------|
| <i>Mrpl32</i><br>NM_029271.2  | Forward<br>Reverse | AGGTGCTGGGAGCTGCTACA<br>AAAGCGACTCCAGCTCTGCT    | 51                         |
| <i>Ppia</i><br>NM_008907.1    | Forward<br>Reverse | CAAACACAAACGGTTCCCAG<br>TTCACCTTCCCAAAGACCAC    | 85                         |
| <i>Ins1</i><br>NM_008386.4    | Forward<br>Reverse | CTTCAGACCTTGGCGTTGGA<br>TGCTGGTGCAGCACTGATCC    | 67                         |
| <i>Ins2</i><br>NM_001185083.2 | Forward<br>Reverse | CATCAGCAAGCAGGAAG<br>CCCAGAGGAAGAGCAG           | 83                         |
| <i>Gck</i><br>NM_010292.5     | Forward<br>Reverse | CTTCACCTTCTCCTTCCCTG<br>ATCTCAAAGTCCCCTCTCCT    | 150                        |
| <i>Pax6</i><br>NM_001244198.2 | Forward<br>Reverse | TGAGAAGTGTGGGAACCAGC<br>AAGTCTTCTGCCTGTGAGCC    | 70                         |
| <i>Nkx2.2</i><br>NM_001077632 | Forward<br>Reverse | GCCTCCAATACTCCCTGC<br>GGTCTCCTTGTGATTGTCCG      | 110                        |
| <i>Slc2a2</i><br>NM_031197.2  | Forward<br>Reverse | CCCTGTTCTAACCAGGGATG<br>TCCAGGCGAATTTATCCAGCA   | 87                         |
| <i>Nkx6.1</i><br>NM_144955.2  | Forward<br>Reverse | CGAACAAACGAAGTACTTGGC<br>TTTCTCCACTTGGTCCCTGC   | 114                        |
| <i>Mafa</i><br>NM_194350.1    | Forward<br>Reverse | GAAGTGCCAGCTCCAGAG<br>CGCCAACCTTCTCGTATTTCTCC   | 100                        |
| <i>Glp1r</i><br>NM_021332.2   | Forward<br>Reverse | CCCATGGGGGATTGTCAAGT<br>AGAAAGTTGACGCCGATAGCA   | 120                        |
| <i>Slc30a8</i><br>NM_172816.4 | Forward<br>Reverse | CGCCTTTTGTATCCTGATTACC<br>GTTGTAGCCAAAGTTCCGTTG | 120                        |
| <i>Pdx1</i><br>NM_008814      | Forward<br>Reverse | CCCTTTCCCGTGGATGAAATC<br>GAATTCCTTCTCCAGCTCCAG  | 145                        |
| <i>Rfx6</i><br>NM_001159389.1 | Forward<br>Reverse | TGCTTACCTGCTGGCTGAAA<br>TGCATTTCTGATTAACTCCACC  | 96                         |

**ESM Figure 1.** Flow chart of experimental design and mouse selection for the different assays.

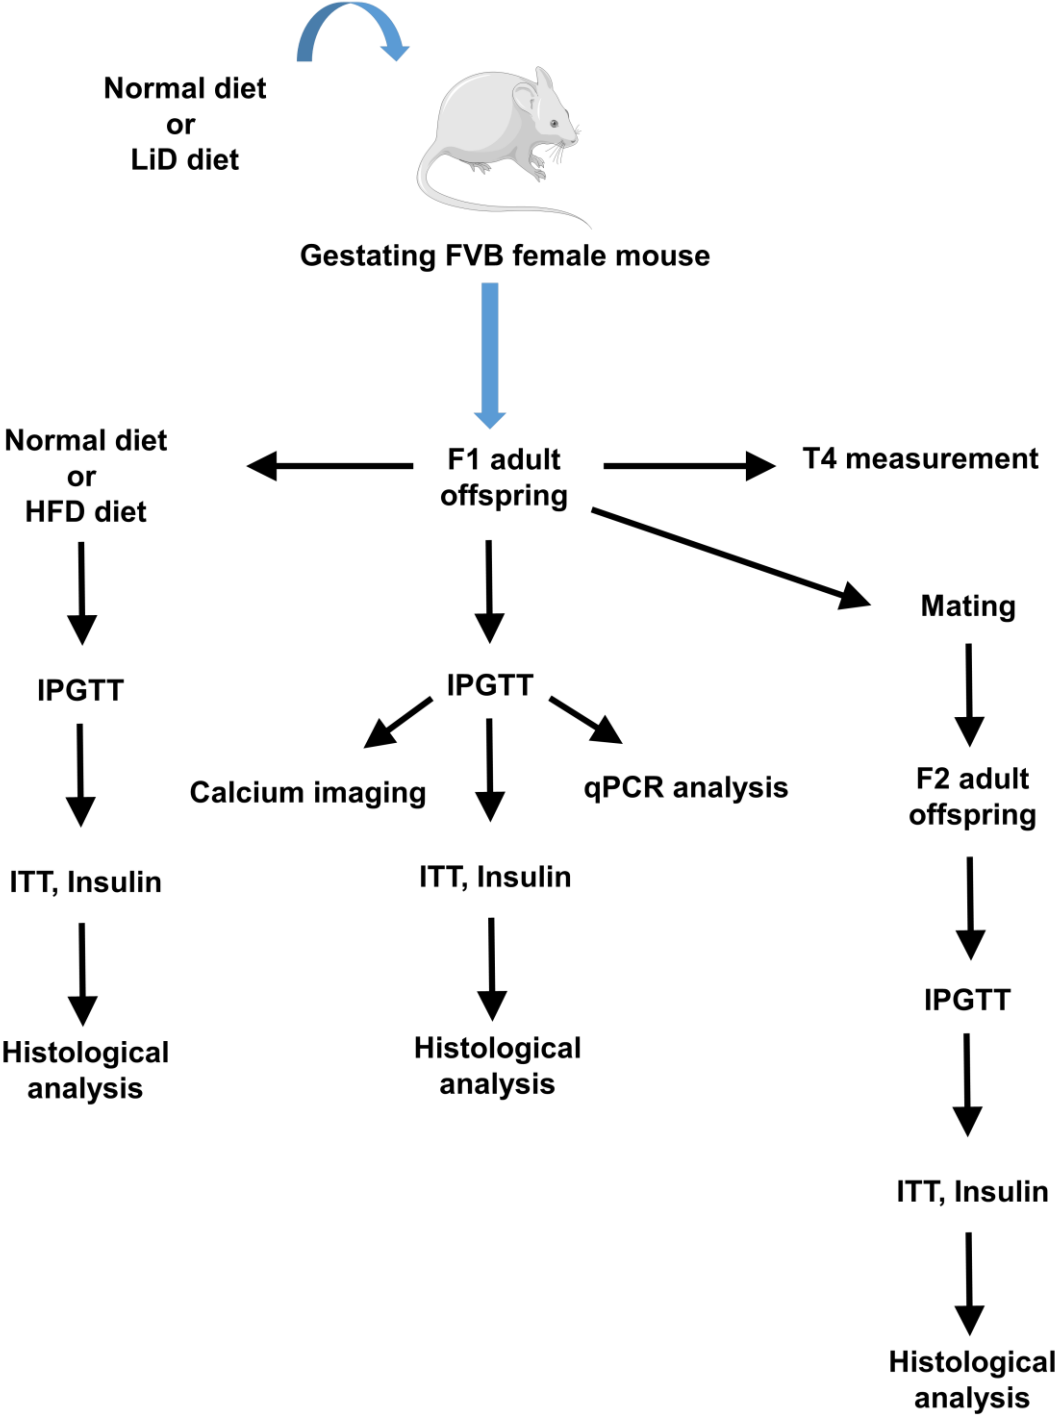

**ESM Figure 2. Frequency distribution of islet sizes in the different groups.** Frequency distribution of islet sizes ( $\mu\text{m}^2$ ) as percent of total islets imaged in males (a) and females (b) (n = 5 males and 10 females/group).

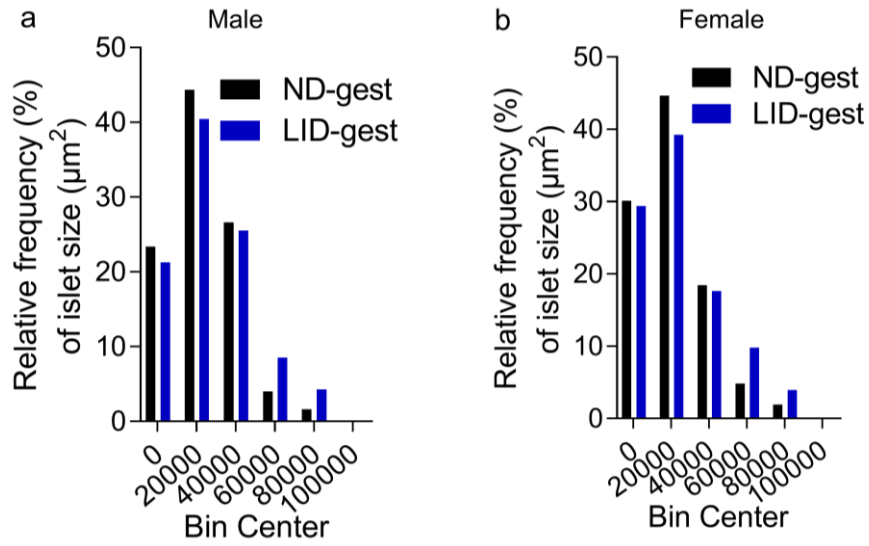

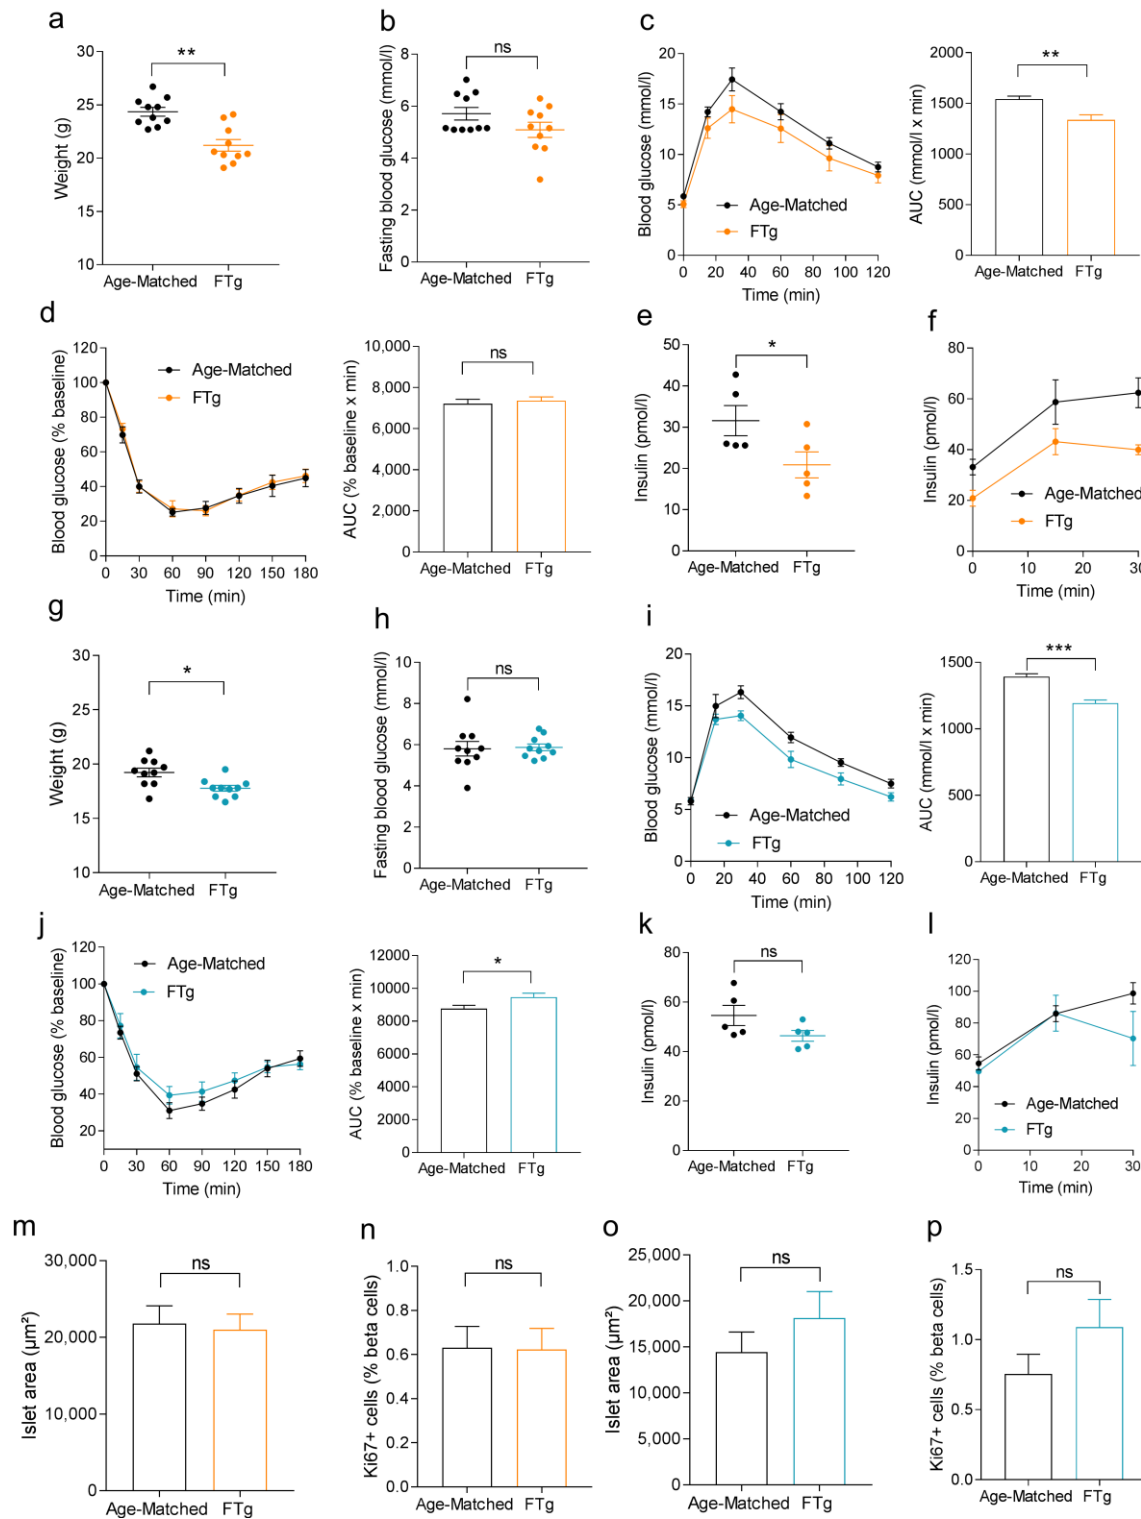

**ESM Figure 3. Effects of gestational hypothyroidism on glucose homeostasis in a second generation of animals.** FTg: second generation of male (in orange) and female (in cyan) offspring from females born to hypothyroid mothers. Adult FTg (8-10 weeks of age) were compared to age-matched controls (in black). Statistical notation: \* $p < 0.05$ , \*\* $p < 0.01$ ,

\*\*\* $p < 0.001$ . a) Male weight at adult age (8-10 weeks) (n = 10 mice/group, mean  $\pm$  SEM, Mann-Whitney). b) Fasting blood glucose in males (n = 10 mice/group, mean  $\pm$  SEM, Mann-Whitney). c) Glucose tolerance test in males (3 g/kg) and area under the curve (AUC) analysis (n = 10 mice/group, mean  $\pm$  SEM, Mann-Whitney). d) Insulin tolerance test in males (0.75 U/kg) and AUC analysis (n = 10 mice/group, mean  $\pm$  SEM, Mann-Whitney). e) Fasting insulin concentrations in males (n = 5 mice/group, mean  $\pm$  SEM, Mann-Whitney). f) *In vivo* insulin responses to glucose in males (3 g/kg), (n = 5 mice/group, mean  $\pm$  SEM). g) Female weight at adult age (8-10 weeks) (n = 10 mice/group, mean  $\pm$  SEM, Mann-Whitney). h) Fasting blood glucose in females (n = 10 mice/group, mean  $\pm$  SEM, Mann-Whitney). i) Glucose tolerance test in females (3 g/kg) and area under the curve (AUC) analysis (n = 10 mice/group, mean  $\pm$  SEM, Mann-Whitney). j) Insulin tolerance test in females (0.75 U/kg) and AUC analysis (n = 10 mice/group, mean  $\pm$  SEM, Two-way ANOVA (left panel) and Mann-Whitney (right panel)). k) Fasting insulin concentrations in females (n = 5 mice/group, mean  $\pm$  SEM, Mann-Whitney). l) *In vivo* insulin responses to glucose in females (3 g/kg), (n = 6 mice/group, mean  $\pm$  SEM). m) Quantification of islet area in males (n = 5 mice/group, mean  $\pm$  SEM, Mann-Whitney). n) Quantification of beta cell proliferation in males (n = 5 mice/group, mean  $\pm$  SEM, Mann-Whitney). o) Quantification of islet area in females (n = 5 mice/group, mean  $\pm$  SEM, Mann-Whitney). p) Quantification of beta cell proliferation in females (n = 5 mice/group, mean  $\pm$  SEM, Mann-Whitney).
